# Supplementary material for: A Gain-of-Function Mutation of JAK2 in Myeloproliferative Disorders
Source: Atypon-hosted journal article supplement (doi:10.1056/nejmoa051113), 2005-04-27
Supplement: 1779sa1.pdf [file 1779sa1.pdf]

## Supplementary Appendix

This appendix has been provided by the authors to give readers additional information about their work.

Supplement to: Kralovics R, Passamonti F, Buser AS, et al. A gain-of-function mutation of JAK2 in myeloproliferative disorders. *N Engl J Med* 2005;352:1779-90.

## Supplementary Appendix

### Detection of LOH on chromosome 9p

LOH was determined by fluorescent microsatellite PCR using the following primer sequences (asterisks indicate the primers that were labeled with a fluorescent dye at the 5' end):

|         |           |                              |
|---------|-----------|------------------------------|
| D9S1779 | sense     | *CCCTGCCAGGTGTGCATCTG        |
|         | antisense | GTTTCTTCAGGCTCCCTCGTGGCTCT   |
| D9S288  | sense     | GTTTCTTAGCAACCTCAACAGGG      |
|         | antisense | *AATCATCCAGAAAGGCCA          |
| D9S1810 | sense     | GTTTCTTCTGACAGCAGAGCATCC     |
|         | antisense | *CAAGCAAACTTTTATTTGTGA       |
| D9S1681 | sense     | GTTTCTTCAGATTCAGCCATGTTC     |
|         | antisense | *AGGCAGTTGCACAGATAG          |
| D9S1852 | sense     | GTTTCTTGAATCACAACATACACCCAC  |
|         | antisense | *GAAACATTCTTTTACAAGTAACATT   |
| D9S235  | sense     | *CTGTATGGAGAGAGAATACG        |
|         | antisense | GTTTCTTGGTCTCTCCGGTATACTCA   |
| D9S157  | sense     | GTTTCTTAGCAAGGCAAGCCACATTTTC |
|         | antisense | *TGGGGATGCCCAGATAACTATATC    |
| D9S925  | sense     | *TGTGAGCCAAGGCCTTATAG        |
|         | antisense | GTCTGGGTTCTCCAAAGAAA         |
| D9S162  | sense     | *GCAATGACCAGTTAAGGTTC        |
|         | antisense | AATTCCCACAACAAATCTCC         |
| D9S161  | sense     | *TGCTGCATAACAAATTACCAC       |
|         | antisense | GTTTCTTCATGCCTAGACTCCTGATCC  |

## Gene Copy Number

The following primers were used: 1429 TCCTCAGAACGTTGATGGCA and 1430 GTGCTTTGGTCCCTTTATATGGA for *JAK2*, and 1283 CCATGGACGACGGGT-TTCT and 1284 TGTACAGGACGTAGGAGGGTGA for *LOC221154*. The SYBR Green PCR Master Mix (Applied Biosystems) was used and reactions were analyzed by the 7000 Sequence Detection System (Applied Biosystems). The threshold cycles for *JAK2* and *LOC221154* were simultaneously measured for each sample in duplicates. The relative quantification was performed with the  $\Delta\Delta C_T$  method (Applied Biosystems, manufacturer's recommendations) using a calibrator DNA sample from granulocytes of a healthy person.

## *JAK2* Sequencing

The *JAK2* cDNA was sequenced using the following primers:

|        |           |                      |
|--------|-----------|----------------------|
| Jak2-1 | sense     | GCGACGGCAAATGTTCTGAA |
|        | antisense | GCCACTGAGCAAAGAGGTAA |
| Jak2-2 | sense     | GTGCTGAAGCTCCTCTTCTT |
|        | antisense | CCCTCTTGGTTTGCTTGCTT |
| Jak2-3 | sense     | CAGTGGTCAAGAGGGAAACA |
|        | antisense | TGTCTGAGCGAACAGTTTCC |
| Jak2-4 | sense     | CAACCTCAGTGGGACAAAGA |
|        | antisense | TTCTCGTCTCCACAGACACA |
| Jak2-5 | sense     | GAGCAAGCTTTCTCACAAGC |
|        | antisense | AATTCTGCCCACTTTGGTGC |
| Jak2-6 | sense     | TGCAGTGGAGGAGATAAACC |
|        | antisense | TTTAGATTACGCCGACCAGC |
| Jak2-7 | sense     | CCTGAAATCCCTACAGCATG |

antisense TCATCCAGCCATGTTATCCC

Genomic sequencing of exon 14 of *JAK2* was carried out with primers 1391 GGACAACAGTCAAACAACAATTCTTT and 1392 ACTGACACCTAGCTGTGATC. The DNA fragments were sequenced using the BigDye Terminator v3.1 chemistry (Applied Biosystems).

#### DNA constructs

The mutant *JAK2* cDNA was amplified by RT-PCR using granulocyte RNA isolated from a patient homozygous for the mutation using the primers 1395 GCGACGGCAAATGTTCTGAA and 1404 AATTCTGCCCACTTTGGTGC. The resulting cDNA fragment was cloned into the pCR 2.1-TOPO vector (Invitrogen). An 1.4 kb *XhoI-NcoI* fragment containing the V617F mutation, was introduced to the wild type human *JAK2* cDNA in the expression vector pMSCVpuro (kindly provided by Dr. J. Cools, Flanders Interuniversity Institute for Biotechnology, Leuven, Belgium). The *JAK2* cDNA in the resulting expression construct was verified by sequencing.

#### Cell Proliferation Assays

Stably transfected BaF3 cells were selected with puromycin (2.5 µg/ml). Transiently transfected UT-7/TPO cells were selected using the MACSelect 4.1 transient expression system (Miltenyi Biotech). The proliferation of the cells grown for 3-4 days in presence or absence of cytokines was assessed using the Cell proliferation kit II XTT (Roche Molecular Biochemicals). To determine the survival of the transfected cells without IL-3, we plated cells that were washed four times in PBS at a density of 10<sup>5</sup> cells/ml in RPMI medium

containing 10% fetal calf serum (FCS). The viability of the cells was determined using the trypan blue exclusion assay (Sigma).
